# Supplementary material for: Effects of Water Restriction and Water Replenishment on the Content of Body Water with Bioelectrical Impedance among Young Adults in Baoding, China: A Randomized Controlled Trial (RCT)
Source: MDPI journal article supplement (doi:10.3390/nu13020553), 2021-02-08
Supplement: s1 [file s1]

**Table S1** The characteristics of participants

|                                  | Baseline test        |                   |                   |                    |           | Dehydration test  |                   |                   |                 |           | <i>t</i> | <i>P</i> | Rehydration test        |                         |                         |                       | <i>F</i> | <i>P</i> |
|----------------------------------|----------------------|-------------------|-------------------|--------------------|-----------|-------------------|-------------------|-------------------|-----------------|-----------|----------|----------|-------------------------|-------------------------|-------------------------|-----------------------|----------|----------|
|                                  | WR group<br>1 (n=20) | WR                |                   | NR group<br>(n=18) | Total     | WR                |                   | NR                |                 | Total     |          |          | WR<br>group 1<br>(n=20) | WR<br>group 2<br>(n=20) | WR<br>group 3<br>(n=18) | NR<br>group<br>(n=18) |          |          |
|                                  |                      | group 2<br>(n=20) | group 3<br>(n=18) |                    |           | group 1<br>(n=20) | group 2<br>(n=20) | group 3<br>(n=18) | group<br>(n=18) |           |          |          |                         |                         |                         |                       |          |          |
|                                  |                      |                   |                   |                    |           |                   |                   |                   |                 |           |          |          |                         |                         |                         |                       |          |          |
| Age<br>(year)                    | 20.9±0.9             | 21.1±0.6          | 21.1±1.3          | 21.1±1.2           | 21.0±1.0  | 20.9±0.9          | 21.1±0.6          | 21.1±1.3          | 21.1±1.2        | 21.0±1.0  | -        | -        | 20.9±0.9                | 21.1±0.6                | 21.1±1.3                | 21.1±1.2              | -        | -        |
| Height<br>(cm)                   | 168.3±8.1            | 167.1±7.8         | 163.5±7.9         | 165.9±9.0          | 166.3±8.2 | 168.3±8.1         | 167.1±7.8         | 163.5±7.9         | 165.9±9.0       | 166.3±8.2 | -        | -        | 168.3±8.1               | 167.1±7.8               | 163.5±7.9               | 165.9±9.0             | -        | -        |
| Weight<br>(kg)*                  | 63.7±9.0             | 64.4±13.8         | 58.9±11.9         | 60.8±10.2          | 62.1±11.4 | 63.4±9.2          | 63.9±13.8         | 58.5±11.8         | 60.4±10.2       | 61.6±11.4 | 6.985    | <0.001   | 63.9±9.2                | 64.0±13.8               | 58.5±11.7               | 60.2±10.1             | 1.102    | 0.354    |
| BMI<br>(kg/m²)*                  | 22.6±3.6             | 22.9±3.8          | 21.9±3.4          | 22.0±2.3           | 22.4±3.3  | 22.5±3.6          | 22.7±3.7          | 21.8±3.3          | 21.8±2.3        | 22.2±3.3  | 7.162    | <0.001   | 22.7±3.7                | 22.8±3.7                | 21.8±3.3                | 21.8±2.3              | 0.544    | 0.654    |
| Systolic<br>pressure<br>(mmHg)*  | 112±14               | 110±12            | 109±13            | 110±11             | 110±12    | 109±10            | 107±9             | 109±11            | 107±8           | 108±10    | 3.142    | 0.002    | 113±12                  | 109±10                  | 110±11                  | 108±11                | 0.842    | 0.475    |
| Diastolic<br>pressure<br>(mmHg)* | 67±8                 | 67±11             | 63±9              | 66±7               | 65±8      | 88±7              | 86±10             | 87±9              | 86±8            | 87±8      | 30.874   | <0.001   | 67±8                    | 64±8                    | 64±9                    | 65±8                  | 0.334    | 0.800    |

**Note:** \*, There were significant differences between the baseline test and dehydration test; Values are shown as the mean ± standard deviation (SD). Compare the baseline test and dehydration test, differences were found in weight, BMI, systolic pressure and diastolic pressure, respectively ( $t=6.985$ ,  $p<0.001$ ;  $t=7.162$ ,  $p<0.001$ ;  $t=3.142$ ,  $p=0.002$ ;  $t=30.874$ ,  $p<0.001$ ).

**Table S2** The temperature and humidity of study days

|                  | Indoors          |              | Outdoors         |              |
|------------------|------------------|--------------|------------------|--------------|
|                  | Temperature (°C) | Humidity (%) | Temperature (°C) | Humidity (%) |
| First study day  | 20.7             | 59           | 22.0             | 64           |
| Second study day | 20.5             | 57           | 20.4             | 55           |
| Third study day  | 20.5             | 63           | 19.8             | 61           |

**Table S3** The thirst, urine and plasma biomarkers of participants

|                         | Baseline test |            |            |            |            | Dehydration test |            |            |            |            | <i>t</i> | <i>P</i> | Rehydration test |             |            |            | <i>F</i> | <i>P</i> |
|-------------------------|---------------|------------|------------|------------|------------|------------------|------------|------------|------------|------------|----------|----------|------------------|-------------|------------|------------|----------|----------|
|                         | WR group      | WR group   | WR group   | NR group   | Total      | WR group         | WR group   | WR group   | NR group   | Total      |          |          | WR group 1       | WR group    | WR group   | NR group   |          |          |
|                         | 1 (n=20)      | 2 (n=20)   | 3 (n=18)   | (n=18)     | (n=76)     | 1 (n=20)         | 2 (n=20)   | 3 (n=18)   | (n=18)     | (n=76)     |          |          | (n=20)           | 2 (n=20)    | 3 (n=18)   | (n=18)     |          |          |
| Plasma                  |               |            |            |            |            |                  |            |            |            |            |          |          |                  |             |            |            |          |          |
| Osmolality              | 293±5         | 293±7      | 294±5      | 293±4      | 293±5      | 297±6            | 298±4      | 296±5      | 296±4      | 297±5      | -6.157   | <0.001   | 292±4†           | 294±4       | 293±5      | 295±6      | 2.035    | 0.117    |
| (mOsm/kg)               |               |            |            |            |            |                  |            |            |            |            |          |          |                  |             |            |            |          |          |
| *                       |               |            |            |            |            |                  |            |            |            |            |          |          |                  |             |            |            |          |          |
| Urine                   |               |            |            |            |            |                  |            |            |            |            |          |          |                  |             |            |            |          |          |
| Osmolality              | 840±261       | 829±170    | 786±205    | 830±234    | 822±217    | 1111±130         | 1079±114   | 1093±71    | 1092±78    | 1094±101   | 11.22    | <0.001   | 453±273†         | 888±352†    | 921±265†   | 1131±72    | 22.24    | <0.001   |
| (mOsm/kg)               |               |            |            |            |            |                  |            |            |            |            |          |          |                  |             |            |            |          |          |
| *                       |               |            |            |            |            |                  |            |            |            |            |          |          |                  |             |            |            |          |          |
| USG                     | 1.025±0.00    | 1.025±0.00 | 1.024±0.00 | 1.026±0.00 | 1.025±0.00 | 1.028±0.00       | 1.029±0.00 | 1.029±0.00 | 1.029±0.00 | 1.029±0.00 | -5.019   | <0.001   | 1.014±0.009      | 1.025±0.00  | 1.026±0.00 | 1.029±0.00 | 17.96    | <0.001   |
|                         | 6             | 4          | 6          | 5          | 5          | 4                | 3          | 4          | 2          | 3          |          |          | 8                | 7           | 4          | 6          |          |          |
| Hydration statuses (%)* |               |            |            |            |            |                  |            |            |            |            |          |          |                  |             |            |            |          |          |
| Dehydration             | 13 (65.0)     | 12 (60.0)  | 9 (50.0)   | 10 (55.6)  |            | 20 (100.0)       | 20 (100.0) | 18 (100.0) | 18 (100.0) |            |          |          | 3 (15.0) ††      | 15 (75.0) † | 14 (77.8)  | 18 (100.0) |          |          |
| n                       |               |            |            |            |            |                  |            |            |            |            |          |          |                  |             |            |            |          |          |
| Middle                  | 5 (25.0)      | 8 (40.0)   | 8 (44.4)   | 5 (27.8)   |            | 0 (0.0)          | 0 (0.0)    | 0 (0.0)    | 0 (0.0)    |            | 46.97    | <0.001   | 4 (20.0)         | 0 (0.0)     | 2 (11.1)   | 0 (0.0)    | 43.17    | <0.001   |
| hydration               |               |            |            |            |            |                  |            |            |            |            |          |          |                  |             |            |            |          |          |
|                         |               |            |            |            |            |                  |            |            |            |            |          |          |                  |             |            |            |          |          |
| Optimal                 | 2 (10.0)      | 0 (0.0)    | 1 (5.6)    | 3 (16.7)   |            | 0 (0.0)          | 0 (0.0)    | 0 (0.0)    | 0 (0.0)    |            |          |          | 13 (65.0)        | 5 (25.0)    | 2 (11.1)   | 0 (0.0)    |          |          |
| hydration               |               |            |            |            |            |                  |            |            |            |            |          |          |                  |             |            |            |          |          |

**Note:** Values are shown as the mean ± standard deviation (SD), with the exception that percentages were shown as n (percentage); \*, There were significant differences between the baseline and water

restriction of 36h; <sup>#</sup>, there were significant differences between the four groups (WR group 1, WR group 2, WR group 3 and NR group) after water restriction of 36h; <sup>†</sup>, there were significant differences between water restriction of 36h and water supplementation within the group. Compared with baseline test, the osmolality of plasma increased ( $t=-6.157, p<0.001$ ) in dehydration test. The thirst, the osmolality of urine and USG increased ( $t=-6.758, p<0.001$ ;  $t=-11.221, p<0.001$ ;  $t=-5.019, p<0.001$ ), significant differences were found in the hydration statuses ( $F=46.973, p<0.001$ ). Compared with dehydration test, in rehydration test, there were significant decreases in WR group 1, WR group 2 and WR group 3 in thirst ( $t=8.661, p<0.001$ ;  $t=6.099, p<0.001$ ;  $t=2.605, p=0.018$ ), no significant increase was found in NR group ( $t=-1.169, p=0.259$ ); the osmolality of urine in WR group 1, WR group 2 and WR group 3 decreased ( $t=11.247, p<0.001$ ;  $t=2.440, p=0.025$ ;  $t=2.533, p=0.021$ ), but there was a significant increase in NR group ( $t=-2.886, p=0.010$ ); in hydration status, significant differences were found in WR group 1 and WR group 2 ( $\chi^2=32.039, p<0.001$ ;  $\chi^2=7.648, p=0.047$ ), no significant differences were found in WR group 3 and NR group ( $\chi^2=3.743, p=0.104$ ;  $p=1.000$ ). When compared the thirst during rehydration test, the improvement of thirst in WR group 1 was great than WR group 2 ( $t=-3.204, p=0.004$ ), but no significant difference was found between WR group 2 and WR group 3 ( $t=-1.666, p=0.104$ ); in the osmolality of urine, WR group 1 was lower than WR group 2 ( $t=-4.365, p<0.001$ ), no significant difference was found between WR group 2 and WR group 3 ( $t=-0.324, p=0.747$ ); in hydration statuses, WR group 1 was better than that in WR group 2 ( $\chi^2=15.397, p<0.001$ ).

**Table S4.** Fluids from food, 24h urine volume, void number and urine osmolality on day 2.

|                        | WR group 1<br>(n=20) | WR group 2<br>(n=20) | WR group 3<br>(n=18) | NR group<br>(n=18) | Total<br>(n=76) | <i>F</i> | <i>P</i> |
|------------------------|----------------------|----------------------|----------------------|--------------------|-----------------|----------|----------|
| Water from food        | 988±253              | 870±187              | 934±210              | 884±185            | 920±212         | 1.264    | 0.293    |
| Water from breakfast   | 79±35                | 100±40               | 82±25                | 80±26              | 85±33           | 1.771    | 0.160    |
| Water from lunch       | 463±123              | 410±99               | 448±102              | 449±101            | 442±107         | 0.900    | 0.446    |
| Water from supper      | 446±130              | 361±99               | 404±122              | 355±107            | 392±119         | 2.568    | 0.055    |
| Water from staple food | 413±146              | 367±114              | 381±111              | 352±72             | 379±115         | 1.001    | 0.398    |
| Water from dishes      | 575±167              | 503±115              | 552±137              | 532±127            | 541±138         | 0.965    | 0.414    |
| 24h urine biomarkers   |                      |                      |                      |                    |                 |          |          |
| Volume of urine        | 939±210              | 893±187              | 934±207              | 830±136            | 971±231         | 0.779    | 0.510    |
| Void number            | 4±1                  | 4±1                  | 4±1                  | 4±1                | 5±1             | 0.279    | 0.840    |
| Osmolality             | 973±101              | 985±104              | 948±104              | 997±83             | 978±98          | 0.840    | 0.476    |
| Na (mmol/L)            | 261±35               | 247±42               | 261±33               | 267±33             | 259±36          | 1.015    | 0.391    |
| K (mmol/L)             | 43.10±10.99          | 45.27±13.63          | 40.68±9.71           | 51.08±12.83        | 45.0±12.3       | 2.523    | 0.064    |
| Cl (mmol/L)            | 233±30               | 213±42               | 227±31               | 223±31             | 224±34          | 1.165    | 0.329    |
| Ca (mmol/L)            | 5.11±2.28            | 5.18±1.71            | 4.80±1.56            | 4.75±1.07          | 4.97±1.71       | 0.303    | 0.823    |
| Phosphorus (mmol/L)    | 22.24±6.26           | 26.99±6.69           | 23.19±5.79           | 25.42±6.92         | 24.47±6.58      | 2.194    | 0.096    |

**Note:** Values are shown as the mean ± standard deviation (SD), with the exception that percentages were shown as n (percentage). Significant differences were found in the urine osmolality, pH and

|                     |             |             |             |             |             |       |       |
|---------------------|-------------|-------------|-------------|-------------|-------------|-------|-------|
| Mg (mmol/L)         | 4.38±2.08   | 4.30±1.74   | 5.04±2.41   | 5.08±2.14   | 4.68±2.08   | 0.753 | 0.524 |
| pH                  | 7.0±0.4     | 6.9±0.5     | 6.9±0.3     | 7.1±0.3     | 7.0±0.4     | 1.735 | 0.167 |
| USG                 | 1.023±0.005 | 1.025±0.004 | 1.023±0.005 | 1.022±0.004 | 1.023±0.004 | 1.733 | 0.168 |
| Hydration state (%) |             |             |             |             |             |       |       |
| Optimal hydration   | 1.7±7.5     | 0.0±0.0     | 2.0±6.0     | 2.6±8.4     |             |       |       |
| Middle hydration    | 8.3±14.8    | 8.0±10.3    | 12.8±13.5   | 8.8±13.7    |             | 1.630 | 0.795 |
| Dehydration         | 90.0±15.7   | 92.0±10.3   | 85.2±12.7   | 88.6±15.2   |             |       |       |

---

USG between males and females ( $t=-2.368$ ,  $p=0.020$ ;  $t=3.125$ ,  $p=0.003$ ;  $t=-2.907$ ,  $p=0.005$ ). But no significant differences were found in the concentrations of Na, K, Cl, Ca, Phosphorus and Mg of urine between males and females ( $t=0.318$ ,  $p=0.751$ ;  $t=0.952$ ,  $p=0.344$ ;  $t=-1.575$ ,  $p=0.120$ ;  $t=-1.186$ ,  $p=0.239$ ;  $t=-0.653$ ,  $p=0.516$ ;  $t=0.273$ ,  $p=0.786$ ). The amounts of water from lunch, supper, dishes, staple food and the water from food were different between males and females ( $t=5.846$ ,  $p<0.001$ ;  $t=8.266$ ,  $p<0.001$ ;  $t=5.451$ ,  $p<0.001$ ;  $t=7.497$ ,  $p<0.001$ ;  $t=8.497$ ,  $p<0.001$ ) and the amounts of water from breakfast did not differ significantly ( $t=1.790$ ,  $p=0.077$ ).
